# Supplementary material for: Synthesis of a peptide-universal nucleotide antigen: towards next-generation antibodies to detect topoisomerase I-DNA covalent complexes
Source: Royal Society of Chemistry journal article supplement (doi:10.1039/c5ob02049b), 2016-01-01
Supplement: c5ob02049b1.pdf [file c5ob02049b1.pdf]

SUPPORTING INFORMATION

**Synthesis of a Peptide-Universal Nucleotide Antigen: Towards Next-Generation Antibodies to Detect Topoisomerase I-DNA Covalent Complexes**

Angela L. Perkins,<sup>a</sup> Kevin L. Peterson,<sup>b</sup> Thomas G. Beito,<sup>c</sup> Karen S. Flatten,<sup>b</sup> Scott H. Kaufmann,<sup>b</sup>  
and Daniel A. Harki<sup>a,\*</sup>

<sup>a</sup>Department of Medicinal Chemistry, University of Minnesota, 2231 6<sup>th</sup> Street S.E.,  
Minneapolis, MN, 55455, United States

<sup>b</sup>Division of Oncology Research and <sup>c</sup>Monoclonal Antibody Core, Mayo Clinic, 200 First Street S.W.  
Rochester, MN 55905, United States

\*Corresponding author: daharki@umn.edu

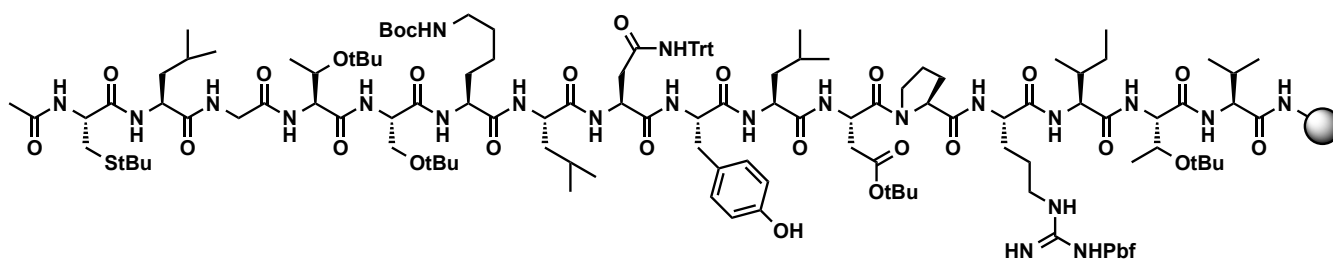

**Figure S1.** Resin bound peptide for direct conjugation.

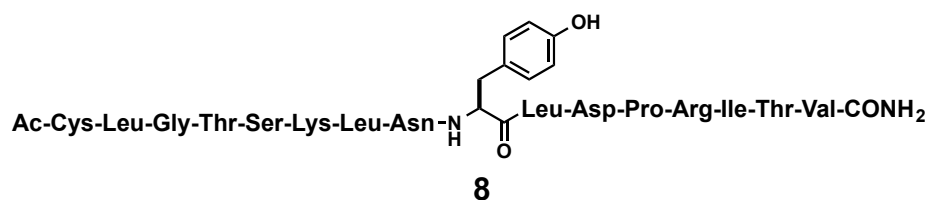

**Figure S2.** Unmodified peptide **8**.
